# Supplementary material for: Water splitting over transition metal-doped SrTiO3 photocatalysts with response to visible light up to 660 nm
Source: Royal Society of Chemistry journal article supplement (doi:10.1039/d4sc03978e), 2024-01-01
Supplement: d4sc03978e1.pdf [file d4sc03978e1.pdf]

## Supporting Information

### **Water splitting over transition metal-doped SrTiO<sub>3</sub> photocatalysts with response to visible light up to 660 nm**

Kyohei Kaiya,<sup>a</sup> Yoshiya Ueki,<sup>a</sup> Hiromasa Kawamoto,<sup>a</sup> Kenta Watanabe,<sup>a</sup> Shunya Yoshino,<sup>a</sup> Yuichi Yamaguchi,<sup>a,b</sup> and Akihiko Kudo<sup>a,b\*</sup>

<sup>a</sup>Department of Applied Chemistry, Faculty of Science, Tokyo University of Science, 1-3 Kagurazaka, Shinjuku-ku, Tokyo 162-8601, Japan

<sup>b</sup>Carbon Value Research Center, Research Institute for Science & Technology, Tokyo University of Science, 2641 Yamazaki, Noda-shi, Chiba-ken, 278-8510, Japan

Email: a-kudo@rs.tus.ac.jp

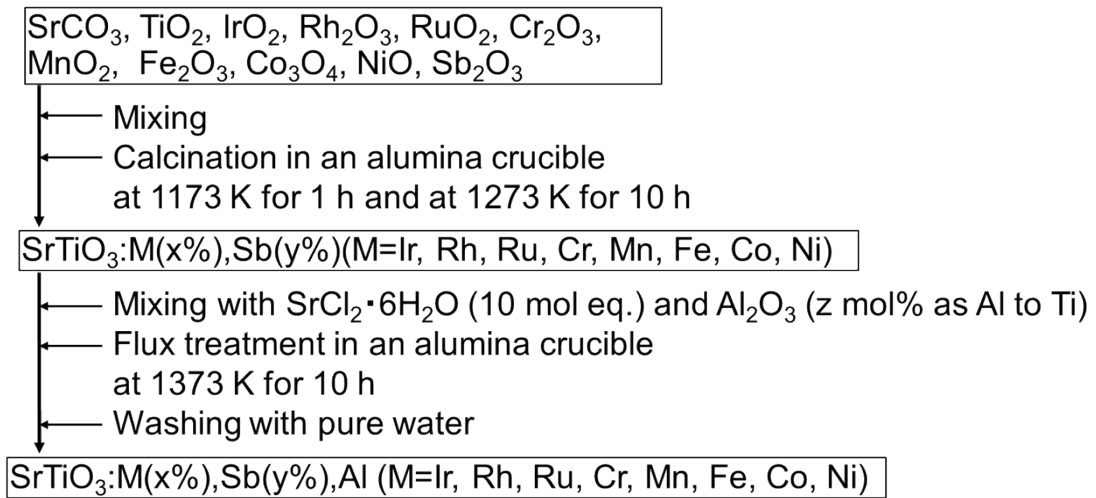

**Figure S1.** Flowchart of preparation of  $\text{SrTiO}_3\text{:M}(x\%),\text{Sb}(y\%),\text{Al}$  (M=Ir, Rh, Ru, Cr, Mn, Fe, Co, Ni) by the  $\text{SrCl}_2$ -flux treatment with/without  $\text{Al}_2\text{O}_3$  addition after SSR.

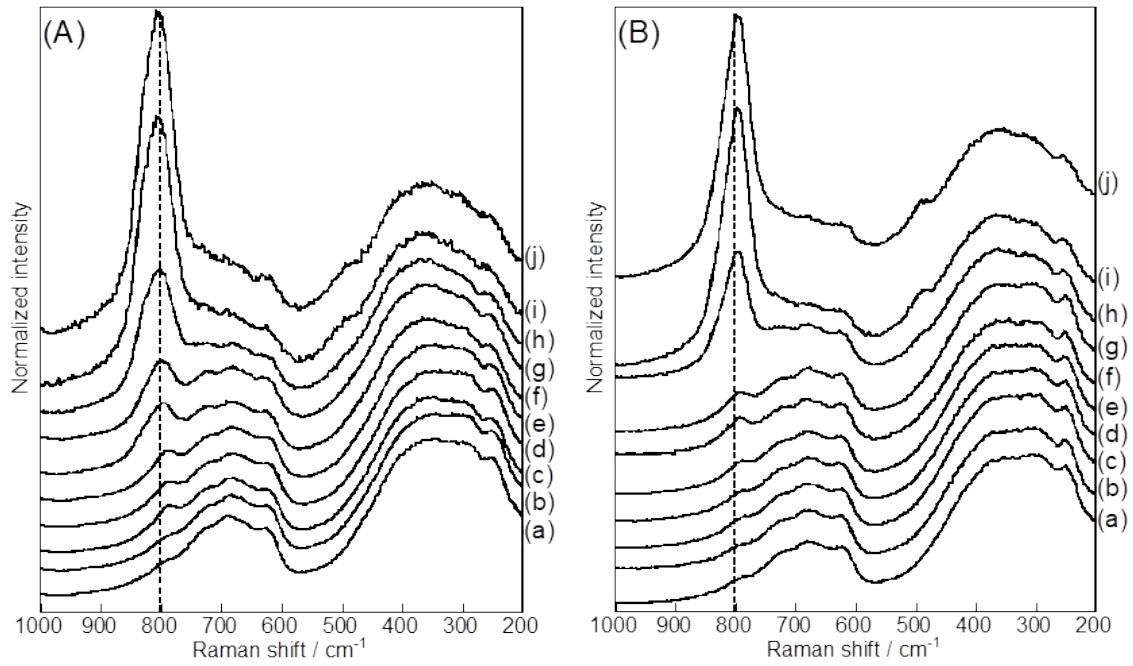

**Figure S2.** Raman spectra of SSR-prepared  $\text{SrTiO}_3:\text{Ir}(x\%),\text{Sb}(2x\%),\text{Al}$  with the flux treatment without  $\text{Al}_2\text{O}_3$  addition. Samples were doped with (a)  $x=0$ , (b)  $x=0.001$ , (c)  $x=0.008$ , (d)  $x=0.009$ , (e)  $x=0.01$ , (f)  $x=0.025$ , (g)  $x=0.05$ , (h)  $x=0.1$ , (i)  $x=0.2$ , (j)  $x=0.3$ . Excitation wavelengths of (A) and (B) were 532 nm and 785 nm, respectively.

**Table S1.** Molar ratio of Ir and Sb in SSR-prepared SrTiO<sub>3</sub>:Ir,Sb with or without the flux treatment without Al<sub>2</sub>O<sub>3</sub> addition determined by XRF

| Photocatalyst                               | SrCl <sub>2</sub> -flux treatment | Molar ratio %         |                       |
|---------------------------------------------|-----------------------------------|-----------------------|-----------------------|
|                                             |                                   | [Ir]/([Ti]+[Ir]+[Sb]) | [Sb]/([Ti]+[Ir]+[Sb]) |
| SrTiO <sub>3</sub>                          | ×                                 | 0                     | 0                     |
| SrTiO <sub>3</sub> :Ir(0.025%),Sb(0.05%)    | ×                                 | Trace                 | Trace                 |
| SrTiO <sub>3</sub> :Ir(0.05%),Sb(0.1%)      | ×                                 | 0.016                 | 0.078                 |
| SrTiO <sub>3</sub> :Ir(0.1%),Sb(0.2%)       | ×                                 | 0.046                 | 0.16                  |
| SrTiO <sub>3</sub> :Ir(0.2%),Sb(0.4%)       | ×                                 | 0.13                  | 0.31                  |
| SrTiO <sub>3</sub> :Ir(0.3%),Sb(0.6%)       | ×                                 | 0.26                  | 0.52                  |
| <hr style="border-top: 1px dashed black;"/> |                                   |                       |                       |
| SrTiO <sub>3</sub>                          | ○                                 | 0                     | 0                     |
| SrTiO <sub>3</sub> :Ir(0.025%),Sb(0.05%)    | ○                                 | Trace                 | Trace                 |
| SrTiO <sub>3</sub> :Ir(0.05%),Sb(0.1%)      | ○                                 | 0.015                 | 0.081                 |
| SrTiO <sub>3</sub> :Ir(0.1%),Sb(0.2%)       | ○                                 | 0.047                 | 0.16                  |
| SrTiO <sub>3</sub> :Ir(0.2%),Sb(0.4%)       | ○                                 | 0.14                  | 0.37                  |
| SrTiO <sub>3</sub> :Ir(0.3%),Sb(0.6%)       | ○                                 | 0.24                  | 0.49                  |

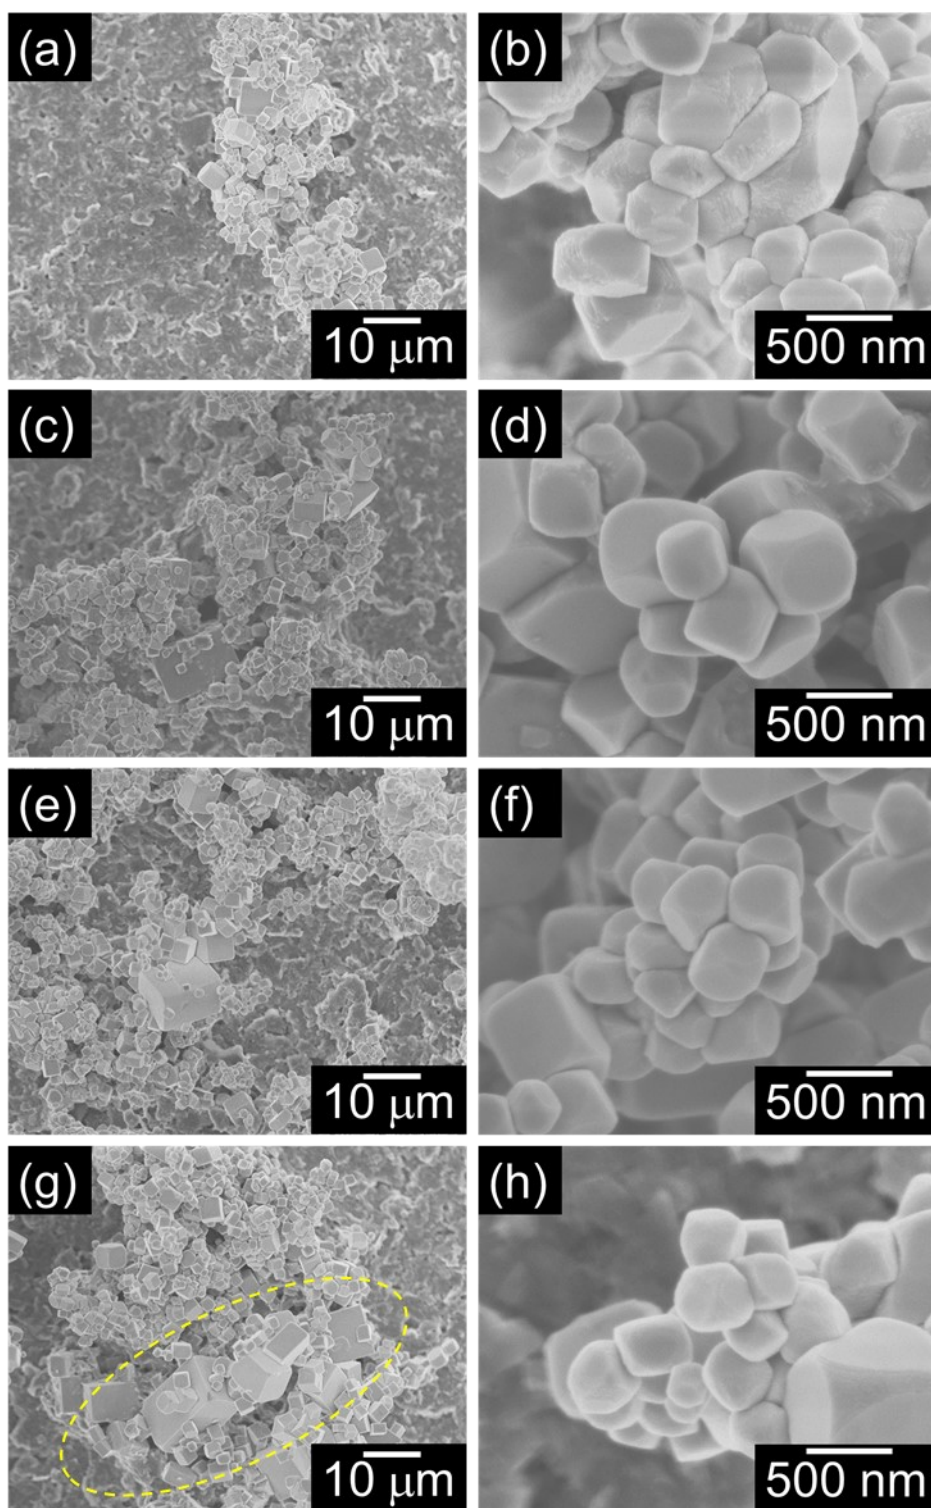

**Figure S3.** SEM images of SSR-prepared  $\text{SrTiO}_3:\text{Ir}(0.009\%),\text{Sb}(y\%)$  with the flux treatment without  $\text{Al}_2\text{O}_3$  addition. Samples were doped with (a)  $y=0$ , (c)  $y=0.009$ , (e)  $x=0.018$ , (g)  $x=0.027$ . (b), (d), (f), (h) are the magnified images of (a), (c), (e), (g), respectively.

**Table S2.** Effect of an amount of Al<sub>2</sub>O<sub>3</sub> addition in the flux on photocatalytic water splitting over SrTiO<sub>3</sub>:Ir(0.009%),Sb(0.018%),Al prepared by the flux treatment after SSR under visible light irradiation.

| Amount of Al <sub>2</sub> O <sub>3</sub> addition<br>(mol% as Al to Ti) | Water splitting activity/ $\mu\text{mol h}^{-1}$ |                |
|-------------------------------------------------------------------------|--------------------------------------------------|----------------|
|                                                                         | H <sub>2</sub>                                   | O <sub>2</sub> |
| 0                                                                       | 41                                               | 21             |
| 0.5                                                                     | 47                                               | 23             |
| 1                                                                       | 62                                               | 30             |
| 1.5                                                                     | 56                                               | 26             |
| 2                                                                       | 60                                               | 28             |
| 3                                                                       | 53                                               | 25             |
| 5                                                                       | 50                                               | 23             |

Photocatalyst: 0.2 g, cocat.: RhCrO<sub>x</sub>(Rh 0.1 mol%, Cr 0.1 mol%) impregnation, reactant solution: Pure water (120 mL), light source: a 300 W Xe lamp ( $\lambda > 440$  nm), cell: a top-irradiation cell with a Pyrex window, system: a gas-tight circulation system.

**Table S3.** Photocatalytic water splitting under visible light irradiation over various cocatalysts-loaded SrTiO<sub>3</sub>:Ir(0.009%),Sb(0.018%),Al prepared by the flux treatment with Al<sub>2</sub>O<sub>3</sub> (1%) addition after SSR

| Entry | Cocatalyst (mol% as metal)           | Water splitting activity/ $\mu\text{mol h}^{-1}$ |                |
|-------|--------------------------------------|--------------------------------------------------|----------------|
|       |                                      | H <sub>2</sub>                                   | O <sub>2</sub> |
| 1     | none                                 | 0.01                                             | 0.005          |
| 2     | RhCrO <sub>x</sub> (0.05)            | 46                                               | 21             |
| 3     | RhCrO <sub>x</sub> (0.08)            | 54                                               | 26             |
| 4     | RhCrO <sub>x</sub> (0.1)             | 62                                               | 30             |
| 5     | RhCrO <sub>x</sub> (0.2)             | 18                                               | 8.8            |
| 6     | IrO <sub>2</sub> (0.2)               | 0.009                                            | 0              |
| 7     | CoO <sub>x</sub> (0.9)               | 0.05                                             | 0.02           |
| 8     | RuO <sub>2</sub> (0.5)               | 0.5                                              | 0.2            |
| 9     | Rh <sub>2</sub> O <sub>3</sub> (0.1) | 12                                               | 5.6            |
| 10    | Cr <sub>2</sub> O <sub>3</sub> (0.1) | 0.13                                             | 0.07           |

Photocatalyst: 0.2 g, cocatalyst: RhCrO<sub>x</sub>, Rh<sub>2</sub>O<sub>3</sub>, and Cr<sub>2</sub>O<sub>3</sub> (Impregnation in air at 623 K for 1 h), IrO<sub>2</sub>, CoO<sub>x</sub>, and RuO<sub>2</sub> (Impregnation in air at 673 K for 2 h), reactant solution: pure water (120 mL), light source: a 300 W Xe lamp ( $\lambda > 440$  nm), cell: a top-irradiation cell with a Pyrex window, system: a gas-tight circulation system.

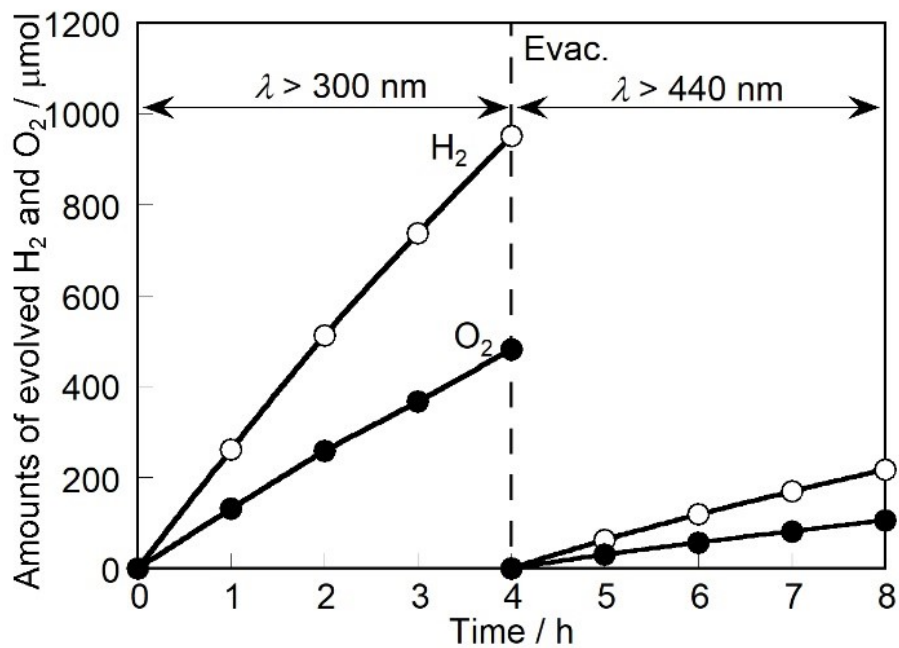

**Figure S4.** Photocatalytic water splitting over RhCrO<sub>x</sub>-loaded SrTiO<sub>3</sub>:Ir(0.009%),Sb(0.018%),Al prepared by the flux treatment with Al<sub>2</sub>O<sub>3</sub> (1%) addition after SSR. Photocatalyst: 0.2 g, cocat.: RhCrO<sub>x</sub> (Rh 0.1 mol%, Cr 0.1 mol%) impregnation, reactant solution: pure water (120 mL), light source: a 300 W Xe lamp, system: a gas-tight circulation system.



**Table S4.** Responsive wavelength, AQY and STH of various transition metals-doped SrTiO<sub>3</sub>:Al and representative visible-light-driven single particulate photocatalysts for overall water splitting.

| Photocatalyst                             | Responsive wavelength/nm | AQY % at 420 nm | STH %             |                                        |
|-------------------------------------------|--------------------------|-----------------|-------------------|----------------------------------------|
|                                           |                          |                 | Full <sup>a</sup> | Vis <sup>b</sup> ( $\lambda > 440$ nm) |
| SrTiO <sub>3</sub> :Ir(0.009%),Sb(0.018%) | 660                      | 0.73            | 0.33              | 0.030                                  |
| SrTiO <sub>3</sub> :Rh(0.02%),Sb(0.04%)   | 570                      | 0.31            | 0.16              | 0.020                                  |
| SrTiO <sub>3</sub> :Ru(0.03%),Sb(0.06%)   | 600                      | 0.33            | 0.16              | 0.019                                  |
| SrTiO <sub>3</sub> :Cr(0.01%)             | 660                      | —               | 0.31              | 0.0093                                 |

<sup>a</sup>STH (%) (Full)

$$= (100 \times ([\Delta G^\circ(\text{H}_2\text{O})/\text{J mol}^{-1}] \times [\text{rate of H}_2 \text{ evolution}(\text{under full arc from a solar simulator})/\text{mol h}^{-1}])) / ([3600 / \text{s h}^{-1}] \times [\text{solar energy}/\text{W cm}^{-2}] \times [\text{irradiation area}/\text{cm}^2])$$

<sup>b</sup>STH (%) (Vis( $\lambda > 440$  nm))

$$= (100 \times ([\Delta G^\circ(\text{H}_2\text{O})/\text{J mol}^{-1}] \times [\text{rate of H}_2 \text{ evolution}(\text{under visible light from a solar simulator})/\text{mol h}^{-1}])) / ([3600/\text{s h}^{-1}] \times [\text{solar energy}/\text{W cm}^{-2}] \times [\text{irradiation area}/\text{cm}^2])$$
